**Title: Basal constriction during midbrain-hindbrain boundary morphogenesis is mediated by Wnt5b and Focal Adhesion Kinase.**

**Authors:** Jennifer H. Gutzman<sup>\*1,5</sup>, Ellie Graeden<sup>\*1,2,6</sup>, Isabel Brachmann<sup>1</sup>, Sayumi Yamazoe<sup>3,7</sup>, James K. Chen<sup>3,4</sup>, Hazel Sive<sup>1,2</sup>

\* equal contribution

<sup>1</sup> Whitehead Institute for Biomedical Research, Cambridge, MA 02142

<sup>2</sup> Department of Biology, Massachusetts Institute of Technology, Cambridge, MA 02139

<sup>3</sup> Department of Chemical and Systems Biology, Stanford University School of Medicine, Stanford, CA 94305

<sup>4</sup> Department of Developmental Biology, Stanford University School of Medicine, Stanford, CA 94305

<sup>5</sup> current address

Department of Biological Sciences  
University of Wisconsin-Milwaukee  
Milwaukee, WI 53201

<sup>6</sup>current address

Talus Analytics LLC  
645 1<sup>st</sup> Ave.; PO Box 1487  
Lyons, CO 80540

<sup>7</sup>current address

Bristol-Myers Squibb  
Redwood City, CA 94063

**Running title:** MHBC basal constriction

**Keywords:** basal constriction, cell shape, morphogenesis, zebrafish, Wnt5b, Focal Adhesion Kinase, midbrain-hindbrain boundary

## ABSTRACT (180 words)

Basal constriction occurs at the zebrafish midbrain-hindbrain boundary constriction (MHBC) and is likely a widespread morphogenetic mechanism. 3D reconstruction demonstrates that MHBC cells are wedge-shaped, and initially constrict basally, with subsequent apical expansion. *wnt5b* is expressed in the MHB and is required for basal constriction. Consistent with a requirement for this pathway, expression of dominant negative Gsk3 $\beta$  overcomes *wnt5b* knockdown. Immunostaining identifies focal adhesion kinase (Fak) as active in the MHB region, and knockdown demonstrates Fak is a regulator of basal constriction. Tissue specific knockdown further indicates that Fak functions cell autonomously within the MHBC. Fak is epistatic to *wnt5b*, suggesting that Wnt5b signals locally as an early step in basal constriction and acts together with more widespread Fak activation. This study delineates signaling pathways that regulate basal constriction during brain morphogenesis.

## INTRODUCTION

Basal constriction is a cell shape change associated with zebrafish midbrain-hindbrain boundary constriction (MHBC) (Gutzman et al., 2008). This process is in contrast to the widely studied morphogenetic mechanism of apical constriction (Martin and Goldstein, 2014). Following our initial identification of the process, basal constriction has been described in several other systems and developmental processes. It is required for zebrafish and medaka optic cup morphogenesis (Bogdanovic et al., 2012; Martinez-Morales et al., 2009; Nicolas-Perez et al., 2016; Sidhaye and Norden, 2017), for notochord cell elongation in *Ciona*, (Dong et al., 2011), and for egg chamber elongation in *Drosophila* (He et al., 2010). Together these findings suggest that basal constriction is a conserved and fundamental morphogenetic process.

We previously demonstrated that basal constriction in the MHBC cells of the neuroepithelium requires an intact basement membrane and is laminin-dependent (Gutzman et al., 2008). During optic cup morphogenesis, basal constriction has been demonstrated to require actomyosin contraction and is also dependent on laminin (Nicolas-Perez et al., 2016; Sidhaye and Norden, 2017). However, the upstream signaling pathways that promote basal constriction have not been identified.

Since basal constriction at the MHBC occurs within a small group of cells, one hypothesis is that there is a localized signaling process involved, within the neuroepithelial sheet. Wnt-PCP signaling is one candidate regulatory pathway. Wnts are crucial for multiple morphogenetic events, including gastrulation, convergent extension, cell migration, and cell adhesion (Ciani and Salinas, 2005) and have been studied during development of the midbrain-hindbrain boundary (Buckles et al., 2004; Gibbs et al., 2017). Wnt5b, a known mediator of morphogenetic events in development is a regulator of cell shape and cell movement. It is required during gastrulation (Jopling and den Hertog, 2005; Kilian et al., 2003; Lin et al., 2010), mesenchymal cell migration and adhesion (Bradley and Drissi, 2011), *Xenopus* bottle cell apical constriction (Choi and Sokol, 2009), and tail morphogenesis (Marlow et al., 2004). In this communication, we demonstrate expression of *wnt5b* at the zebrafish MHBC and find a connection between Wnt5b, Gsk3 $\beta$  and Focal Adhesion Kinase, providing the first delineation of a signaling pathway required for basal constriction.

## RESULTS AND DISCUSSION

### ***Basally constricted cells are wedge-shaped***

To delineate the steps in basal constriction, we examined cell shape during midbrain-hindbrain boundary constriction (MHBC) morphogenesis by injecting wild-type embryos with membrane targeted GFP (mGFP) and imaging using live confocal microscopy (Fig. 1A-D). Morphogenesis takes place beginning at approximately the 18 somite stage (ss) and extends to the prim-6 stage. At the start, the neural tube is composed of a pseudostratified epithelium with established apical-basal polarity (Fig. 1A). We identified three steps in MHBC morphogenesis. First, cells get shorter; second they form a basal constriction, and third they become apically expanded (Fig. 1A-H) (Gutzman et al., 2008; Gutzman et al., 2015). 3D reconstruction of MHBC cells revealed that as the cells basally constrict and apically expand they become wedge-shaped (Fig. 1C-D,G-H). The average basal anteroposterior width of the MHBC cells decreases from 2.1 microns to less than 0.5 microns between 14 ss, when the neuroepithelial cells are uniform in shape, and prim-6, when the cells have become wedge-shaped (Fig. 1I). The progression of MHBC cell shape changes is summarized in Fig. 1J-M. The ability to separate morphogenetic steps temporally supports recent data that discrete molecular and mechanical processes are likely to underlie each step. For example, during early MHB morphogenesis, differential roles were identified for non-muscle myosin IIA and non-muscle myosin IIB in mediating cell shortening and cell narrowing, respectively (Gutzman et al., 2015), and a role for calcium signaling was identified in regulation of cell length, and not cell width, specifically in MHBC cells (Sahu et al., 2017).

### ***wnt5b regulates basal constriction, possibly through Gsk3 $\beta$***

We hypothesized that genes required for basal constriction would be expressed prior to the start of MHBC formation and that expression would be restricted to cells undergoing basal constriction. In assessing the literature, we identified *wnt5b* expression as potentially correlating with MHBC morphogenesis both temporally and spatially (Montero-Balaguer et al., 2006; Thisse, 2005). We demonstrated that *wnt5b* RNA was enriched at the MHBC, using *in situ* hybridization (Fig. 2A-D). There is a low level of *wnt5b* expression throughout the embryo; however, expression increases at the MHBC shortly before morphogenesis begins and persists in this region throughout basal constriction (Fig. 2A-D). To determine the functional significance of Wnt5b in MHBC basal constriction, we used the established *wnt5b* antisense-morpholino modified oligonucleotide (MO) to inhibit function (Lele et al., 2001; Robu et al., 2007; Young et al., 2014). One-cell stage embryos were co-injected with control MO or *wnt5b* splice-site targeting MO with mGFP and live confocal imaging employed to examine cell shape. Consistent with expression, knockdown of *wnt5b* prevented basal constriction of cells at the MHBC (Fig. 2 E-F'). MHBC defects could be a result of anomalous patterning in the MHB, that occurs earlier during development. However, expression of the patterning genes *fgf8* and *pax2*, that are required for MHB formation, was unchanged in *wnt5b* morphants relative to control (Fig. S1). We also confirmed that *wnt5b* knockdown did not disrupt neuroepithelial cell apical-basal polarity (Fig. S1). These data suggest that requirement for *wnt5b* in basal constriction is not due

to loss of early tissue patterning or polarity but is a later effect, perhaps directly impacting morphogenesis.

Wnt5b is a ligand that can activate non-canonical Wnt signaling through Rho and JNK, and can also act through inactivation of Gsk3 $\beta$  (De Rienzo et al., 2011; Niehrs and Acebron, 2010; Terrand et al., 2009; Torii et al., 2008). In zebrafish, Wnt5b functions as a negative regulator of Wnt/b-catenin activity (Westfall et al., 2003) and studies in *Hydra* suggest that, during evagination, Wnt5b may also be involved with cross-talk between the canonical and non-canonical Wnt signaling pathways (Philipp et al., 2009). We asked whether inhibition of Gsk3 $\beta$  is required for basal constriction, using a kinase-dead Gsk3 $\beta$  (dnGsk3 $\beta$ ) that is an established dominant negative construct (De Rienzo et al., 2011; Yost et al., 1996). Supporting a connection between Wnt5b and inhibition of Gsk3 $\beta$ , co-injection of dnGsk3 $\beta$  together with the *wnt5b* MO, prevented deficits in basal constriction seen after injection of *wnt5b* MO alone (Fig. 2G-H). Consistent with this, abnormalities in the gross morphology of the MHBC after injection of *wnt5b* MOs was prevented by expression of the dnGSK3 $\beta$  (Fig. S2). These data are consistent with a pathway in which Wnt5b regulates basal constriction through inhibition of Gsk3 $\beta$ .

### ***Fak is required at the MHBC for basal constriction***

Basal constriction at the MHBC and in the optic cup both require laminin (Gutzman et al., 2008; Nicolas-Perez et al., 2016), a component of the underlying basement membrane, which interacts with integrins to regulate epithelial cell adhesion, migration, and differentiation (Yamada and Sekiguchi, 2015; Yurchenco, 2015). Focal adhesion kinase (Fak), a non-receptor tyrosine kinase, is a regulator of adhesion and cell migration that is activated through intracellular interactions with integrins (Parsons et al., 1994; Schaller, 2010). We therefore hypothesized that Fak plays a role in MHBC basal constriction. Since a primary mechanism for Fak activation is via autophosphorylation at Tyr397 (Schaller, 2010), we specifically hypothesized that autophosphorylated Fak<sup>Y397</sup> would be localized to the MBHC. An antibody specific to Fak autophosphorylation site Y397 stained both the apical and basal surfaces in the neural tube at 18 ss, 24 ss, and prim-6 (Fig. 3A-D).

We tested a role for Fak in basal constriction using knockdown with antisense-morpholino modified oligonucleotide injection. One-cell stage embryos were injected with control MO or a splice-site morpholino targeting the *ptk2.1* gene encoding one of the two *fak* genes in zebrafish. *fak* MO efficacy was confirmed by RT-PCR and Western blot analysis (Fig. S3A-C), and specificity was confirmed by rescue of *fak* MO injected embryos with co-injection of human FAK mRNA (Fig. S3). At the concentration used here, *fak* MO injections did not disrupt MHB tissue patterning or apical polarity markers (Fig. S1). *fak* morphants demonstrated disruption in MHB formation and abnormal basal constriction at the MHBC (Fig. 3E-F'). We tested activity of Fak<sup>Y397</sup> in regulation of basal constriction using a phosphomimetic mutation of Tyr397 to Glu397 (Fak<sup>Y397E</sup>). Consistent with activation of Fak during basal constriction, co-injection of Fak<sup>Y397E</sup> with *fak* MO was able to prevent abnormal basal constriction (Fig. 3G,G').

We further tested the spatial and temporal requirement of Fak in the MHB to mediate basal constriction using injection of a photoactivatable cyclic *fak* MO. With UV activation, the cyclic *fak*

MO becomes linear and binds to its target site (Yamazoe et al., 2012). We injected wild-type embryos with cyclic *fak* MO, Kaede mRNA, and mGFP mRNA. UV activation was performed at 14-16 ss, just before MHBC morphogenesis begins, in the MHB region as delineated by the change of Kaede from green to red. Basal constriction was disrupted after photoactivation of the cyclic *fak* MO, with no effect without activation or after UV treatment of the control MO-injected animals. These data show that Fak is required in the MHB region to mediate basal constriction (Fig. 3 G-K'). We further determined that Fak functions cell autonomously using MHB targeted cell transplantation (Fig. S4). Together these data indicate that Fak activity is required for basal constriction, and that Fak functions in the cells of the region that is undergoing basal constriction, beginning just prior to the start of the process.

### ***Wnt5b signals through Fak to mediate MHBC basal constriction***

Since both *Wnt5b* and *Fak* are required for basal constriction, we asked whether there was an epistatic connection between the two signaling factors. We tested whether human FAK mRNA encoding the activated FAK<sup>Y397E</sup> was able to prevent the basal constriction defect seen after *Wnt5b* inhibition. Indeed, we found that mRNA was able to rescue basal constriction in *wnt5b* morphants (Fig. 4A-G). This effect was not general, as FAK<sup>Y397E</sup> did not rescue basal constriction defects found in laminin mutants ((Gutzman et al., 2008) and Fig. S5). These data indicate that Fak is epistatic to *Wnt5b* in activation of basal constriction at the MHBC.

Together, our results uncover key signaling factors contributing to basal constriction during MHBC morphogenesis. Our data point to a model in which *Wnt5b* signals locally at the MHBC as an early step in basal constriction, and acts together with more widespread *Fak* activation (Fig. 4H). We do not know whether or not *Wnt5b* and *Fak* are functioning at the same time during this process, nor whether their activity is also necessary for the earlier cell shortening or the subsequent apical expansion. Future experiments will uncover the molecular details of this signaling interaction and the role in other steps of MHBC formation.

## **MATERIALS AND METHODS**

### **Zebrafish husbandry**

Zebrafish lines were maintained, and embryo stages were determined, as previously described (Kimmel et al., 1995; Westerfield, 2000). Zebrafish strains used include wild-type AB and *sly*<sup>m86</sup> (Schier et al., 1996).

### **mRNA injections**

All mRNA was *in vitro* transcribed with the mMessage mMachine kit (Thermo Fisher Scientific). Membrane-bound GFP (mGFP) mRNA was injected at 100-200 pg/embryo (kindly provided by J. B. Green, Dana-Farber Cancer Institute Boston, MA). Membrane-bound Cherry (mCherry) mRNA was injected at 50 pg/embryo (kindly provided by Dr. Roger Tsien, University of California San Diego). Photoconvertible Kaede mRNA was injected at 100 pg/embryo. pCS2+Kaede was kindly provided by Atsushi Miyawaki (RIKEN) (Ando et al., 2002). Human Focal Adhesion Kinase (FAK) (accession number BC035404) was purchased from Open Biosystems, EHS1001-5481173) and constructs were generated by subcloning into the pCS2+

expression plasmid. mRNA was *in vitro* transcribed and injected at 200-250 pg/embryo. pCS2+FAK was used as the backbone to generate the FAK<sup>Y397E</sup> phosphomimetic using QuickChange Site-Directed Mutagenesis (Agilent). For each mRNA injection and rescue experiment, all embryos were injected with equal amounts of total mRNA. This included total mGFP when needed for imaging by scanning confocal microscopy. All microinjection experiments were performed at least three times.

### **Live imaging and cell shape analysis**

Live imaging of whole embryos was conducted using brightfield and fluorescent microscopy (SteREO Disvovery.V8, Zeiss). Live scanning confocal imaging was conducted as previously described (Graeden and Sive, 2009). Briefly, embryos were mounted inverted in 0.7% agarose and imaged using a 40X water immersion lens. Imaging was conducted using a Zeiss LSM510 or LSM720 scanning confocal microscope. Data was analyzed using Photoshop (Adobe) and Illustrator (Adobe) for cell outlines. 3D cell reconstruction was performed using 3D Doctor (Able Software). Individual cells at the MHBC were manually outlined in each z-section and rendered in 3D. A minimum of 6 embryos were imaged by scanning confocal microscopy and analyzed for basal constriction for each condition. Quantification of cell width was conducted using Imaris (Bitplane). The width of six cells at the MHBC from each of three embryos was measured at 300X zoom. Measurements were averaged and error bars reflect standard deviation for each condition.

### **Morpholino injections**

Splice site-blocking morpholino (MO) antisense oligonucleotides were injected into embryos at the one-cell stage. Morpholinos and concentrations used are as follows: 3 ng/embryo of *wnt5b* MO targeting the exon5/6 splice donor 5'-TGTTTATTTCTCACCATTCTTCCG-3' (Kim et al., 2005; Robu et al., 2007); 0.75 ng/embryo of *fak* MO (*ptk2.1*) targeting the exon 12/13 splice donor 5'-GTGTGTTTGGGTTCTCACCTTTCTG-3'; non-specific sequence standard control MO 5'-CCTTTACCTCAGTTACAATTTATA-3' at the concentration equal to the test condition; and *p53* MO 5'-GCGCATTGCTTTGCAAGAATTG-3' was co-injected at a concentration equal to 1.5 times the concentration of the test condition. Morpholinos were purchased from Gene Tools, LLC.

### **Region specific knockdown by morpholino photoconversion**

For photoactivatable morpholino experiments, we injected one-cell stage embryos with 1 ng/embryo of splice site-targeting cyclic *fak* MO (*ptk2.1*) 5'-GTGGTGCTAACTGTCGGTCATATT-3'. The *fak* MO was cyclized with a photocleavable linker as previously described (Yamazoe et al., 2012) and remains inactive until "uncaging" by UV light. Linker photolysis reverts the MO to an linear oligonucleotide that can target the *fak* splice site. Embryos were co-injected with mGFP mRNA and Kaede mRNA together with either cyclic *fak* MO or control MO at the one-cell stage. Region and time specific UV activation was conducted at the 10-16 somite stage on cells located in the prospective MHB using a Zeiss Axioplan2 fluorescent microscope with a UV filter and adjustable iris. The tissue region that was

activated by UV light is visible with the Kaede color change from green to red. Only cells that were photoconverted at the MHBC were analyzed for basal constriction as described.

### ***In situ* hybridization**

Antisense and sense RNA probes containing digoxigenin-11-UTP were synthesized from linearized plasmid DNA for *wnt5b* was obtained from Addgene #21282 (Stoick-Cooper et al., 2007). Standard methods for hybridization and for single color labeling were used as described (Sagerstrom et al., 1996). After staining, embryos were de-yolked, flat-mounted in glycerol and imaged with a Nikon compound microscope or a Zeiss Discovery V8.

### **Fak<sup>Y397</sup> immunostaining**

Embryos were fixed in 4% paraformaldehyde; blocked in 2% normal goat serum, 1% BSA, and 0.1% Triton-X100 in PBT; incubated overnight at 4°C in primary antibody (anti-phosphoY397-FAK, 44-624 BioSource, Life Technologies), 1:200; then incubated in secondary antibody (goat anti-rabbit IgG conjugated with Alexa Fluor 488, Invitrogen, 1:500). Embryos were de-yolked and mounted in glycerol. Images were collected using scanning confocal microscopy (Zeiss LSM510 or 710) and analyzed using Photoshop (Adobe).

## **ACKNOWLEDGMENTS**

We thank our Sive lab colleagues for useful criticism and Oliver Paugois for excellent fish care. We would like to acknowledge the W. M. Keck Foundation Biological Imaging Facility at the Whitehead Institute for advice and imaging assistance. pCS2+Kaede was kindly provided by Atsushi Miyawaki (RIKEN). This material is based upon work supported by the National Science Foundation Graduate Research Fellowship under Grant No. 1122374 to E.G.; National Science Foundation Grant no. 1258087 to H.S.; National Institutes of Health R01 GM087292 to J.K.C.; Massachusetts Institute of Technology CSBi/Merck Postdoctoral Fellowship to J.H.G; and Japan Society for the Promotion of Science Fellowship to S.Y.

## **REFERENCES**

- Ando, R., Hama, H., Yamamoto-Hino, M., Mizuno, H. and Miyawaki, A.** (2002). An optical marker based on the UV-induced green-to-red photoconversion of a fluorescent protein. *Proc Natl Acad Sci U S A* **99**, 12651-12656.
- Bogdanovic, O., Delfino-Machin, M., Nicolas-Perez, M., Gavilan, M. P., Gago-Rodrigues, I., Fernandez-Minan, A., Lillo, C., Rios, R. M., Wittbrodt, J. and Martinez-Morales, J. R.** (2012). Numb/Numbl-Opo antagonism controls retinal epithelium morphogenesis by regulating integrin endocytosis. *Developmental cell* **23**, 782-795.
- Bradley, E. W. and Drissi, M. H.** (2011). Wnt5b regulates mesenchymal cell aggregation and chondrocyte differentiation through the planar cell polarity pathway. *J Cell Physiol* **226**, 1683-1693.

- Buckles, G. R., Thorpe, C. J., Ramel, M. C. and Lekven, A. C.** (2004). Combinatorial Wnt control of zebrafish midbrain-hindbrain boundary formation. *Mechanisms of development* **121**, 437-447.
- Choi, S. C. and Sokol, S. Y.** (2009). The involvement of lethal giant larvae and Wnt signaling in bottle cell formation in *Xenopus* embryos. *Developmental biology* **336**, 68-75.
- Ciani, L. and Salinas, P. C.** (2005). WNTs in the vertebrate nervous system: from patterning to neuronal connectivity. *Nat Rev Neurosci* **6**, 351-362.
- De Rienzo, G., Bishop, J. A., Mao, Y., Pan, L., Ma, T. P., Moens, C. B., Tsai, L. H. and Sive, H.** (2011). *Disc1* regulates both beta-catenin-mediated and noncanonical Wnt signaling during vertebrate embryogenesis. *FASEB J* **25**, 4184-4197.
- Dong, B., Deng, W. and Jiang, D.** (2011). Distinct cytoskeleton populations and extensive crosstalk control Ciona notochord tubulogenesis. *Development* **138**, 1631-1641.
- Gibbs, H. C., Chang-Gonzalez, A., Hwang, W., Yeh, A. T. and Lekven, A. C.** (2017). Midbrain-Hindbrain Boundary Morphogenesis: At the Intersection of Wnt and Fgf Signaling. *Front Neuroanat* **11**, 64.
- Graeden, E. and Sive, H.** (2009). Live imaging of the zebrafish embryonic brain by confocal microscopy. *J Vis Exp*.
- Gutzman, J. H., Graeden, E. G., Lowery, L. A., Holley, H. S. and Sive, H.** (2008). Formation of the zebrafish midbrain-hindbrain boundary constriction requires laminin-dependent basal constriction. *Mechanisms of development* **125**, 974-983.
- Gutzman, J. H., Sahu, S. U. and Kwas, C.** (2015). Non-muscle myosin IIA and IIB differentially regulate cell shape changes during zebrafish brain morphogenesis. *Developmental biology* **397**, 103-115.
- He, L., Wang, X., Tang, H. L. and Montell, D. J.** (2010). Tissue elongation requires oscillating contractions of a basal actomyosin network. *Nat Cell Biol* **12**, 1133-1142.
- Jopling, C. and den Hertog, J.** (2005). Fyn/Yes and non-canonical Wnt signalling converge on RhoA in vertebrate gastrulation cell movements. *EMBO reports* **6**, 426-431.
- Kilian, B., Mansukoski, H., Barbosa, F. C., Ulrich, F., Tada, M. and Heisenberg, C. P.** (2003). The role of Ppt/Wnt5 in regulating cell shape and movement during zebrafish gastrulation. *Mechanisms of development* **120**, 467-476.
- Kim, H. J., Schleiffarth, J. R., Jessurun, J., Sumanas, S., Petryk, A., Lin, S. and Ekker, S. C.** (2005). Wnt5 signaling in vertebrate pancreas development. *BMC Biol* **3**, 23.
- Kimmel, C. B., Ballard, W. W., Kimmel, S. R., Ullmann, B. and Schilling, T. F.** (1995). Stages of embryonic development of the zebrafish. *Dev Dyn* **203**, 253-310.
- Lele, Z., Bakkers, J. and Hammerschmidt, M.** (2001). Morpholino phenocopies of the swirl, snailhouse, somitabun, minifin, silberblick, and pipetail mutations. *Genesis* **30**, 190-194.
- Lin, S., Baye, L. M., Westfall, T. A. and Slusarski, D. C.** (2010). Wnt5b-Ryk pathway provides directional signals to regulate gastrulation movement. *The Journal of cell biology* **190**, 263-278.
- Marlow, F., Gonzalez, E. M., Yin, C., Rojo, C. and Solnica-Krezel, L.** (2004). No tail cooperates with non-canonical Wnt signaling to regulate posterior body morphogenesis in zebrafish. *Development* **131**, 203-216.
- Martin, A. C. and Goldstein, B.** (2014). Apical constriction: themes and variations on a cellular mechanism driving morphogenesis. *Development* **141**, 1987-1998.
- Martinez-Morales, J. R., Rembold, M., Greger, K., Simpson, J. C., Brown, K. E., Quiring, R., Pepperkok, R., Martin-Bermudo, M. D., Himmelbauer, H. and Wittbrodt, J.** (2009). *ojoplano*-mediated basal constriction is essential for optic cup morphogenesis. *Development* **136**, 2165-2175.
- Montero-Balaguer, M., Lang, M. R., Sachdev, S. W., Knappmeyer, C., Stewart, R. A., De La Guardia, A., Hatzopoulos, A. K. and Knapik, E. W.** (2006). The mother superior



- mutation ablates *foxd3* activity in neural crest progenitor cells and depletes neural crest derivatives in zebrafish. *Dev Dyn* **235**, 3199-3212.
- Nicolas-Perez, M., Kuchling, F., Letelier, J., Polvillo, R., Wittbrodt, J. and Martinez-Morales, J. R.** (2016). Analysis of cellular behavior and cytoskeletal dynamics reveal a constriction mechanism driving optic cup morphogenesis. *Elife* **5**.
- Niehrs, C. and Acebron, S. P.** (2010). Wnt signaling: multivesicular bodies hold GSK3 captive. *Cell* **143**, 1044-1046.
- Parsons, J. T., Schaller, M. D., Hildebrand, J., Leu, T. H., Richardson, A. and Otey, C.** (1994). Focal adhesion kinase: structure and signalling. *J Cell Sci Suppl* **18**, 109-113.
- Philipp, I., Aufschnaiter, R., Ozbek, S., Pontasch, S., Jenewein, M., Watanabe, H., Rentzsch, F., Holstein, T. W. and Hobmayer, B.** (2009). Wnt/beta-catenin and noncanonical Wnt signaling interact in tissue evagination in the simple eumetazoan Hydra. *Proc Natl Acad Sci U S A* **106**, 4290-4295.
- Robu, M. E., Larson, J. D., Nasevicius, A., Beiraghi, S., Brenner, C., Farber, S. A. and Ekker, S. C.** (2007). p53 activation by knockdown technologies. *PLoS Genet* **3**, e78.
- Sagerstrom, C. G., Grinblat, Y. and Sive, H.** (1996). Anteroposterior patterning in the zebrafish, *Danio rerio*: an explant assay reveals inductive and suppressive cell interactions. *Development* **122**, 1873-1883.
- Sahu, S. U., Visetsouk, M. R., Garde, R. J., Hennes, L., Kwas, C. and Gutzman, J. H.** (2017). Calcium signals drive cell shape changes during zebrafish midbrain-hindbrain boundary formation. *Molecular biology of the cell* **28**, 875-882.
- Schaller, M. D.** (2010). Cellular functions of FAK kinases: insight into molecular mechanisms and novel functions. *Journal of cell science* **123**, 1007-1013.
- Schier, A. F., Neuhauss, S. C., Harvey, M., Malicki, J., Solnica-Krezel, L., Stainier, D. Y., Zwartkruis, F., Abdelilah, S., Stemple, D. L., Rangini, Z., et al.** (1996). Mutations affecting the development of the embryonic zebrafish brain. *Development* **123**, 165-178.
- Sidhaye, J. and Norden, C.** (2017). Concerted action of neuroepithelial basal shrinkage and active epithelial migration ensures efficient optic cup morphogenesis. *Elife* **6**.
- Stoick-Cooper, C. L., Weidinger, G., Riehle, K. J., Hubbert, C., Major, M. B., Fausto, N. and Moon, R. T.** (2007). Distinct Wnt signaling pathways have opposing roles in appendage regeneration. *Development* **134**, 479-489.
- Terrand, J., Bruban, V., Zhou, L., Gong, W., El Asmar, Z., May, P., Zurhove, K., Haffner, P., Philippe, C., Woldt, E., et al.** (2009). LRP1 controls intracellular cholesterol storage and fatty acid synthesis through modulation of Wnt signaling. *The Journal of biological chemistry* **284**, 381-388.
- Thisse, C., and Thisse, B.** (2005). High Throughput Expression Analysis of ZF-Models Consortium Clones. . *ZFIN Direct Data Submission* (<http://zfin.org>).
- Torii, K., Nishizawa, K., Kawasaki, A., Yamashita, Y., Katada, M., Ito, M., Nishimoto, I., Terashita, K., Aiso, S. and Matsuoka, M.** (2008). Anti-apoptotic action of Wnt5a in dermal fibroblasts is mediated by the PKA signaling pathways. *Cellular signalling* **20**, 1256-1266.
- Westerfield, M.** (2000). *The Zebrafish Book: A guide for the laboratory use of zebrafish (Danio rerio)*. Eugene: University of Oregon Press.
- Westfall, T. A., Brimeyer, R., Twedt, J., Gladon, J., Olberding, A., Furutani-Seiki, M. and Slusarski, D. C.** (2003). Wnt-5/pipetail functions in vertebrate axis formation as a negative regulator of Wnt/beta-catenin activity. *The Journal of cell biology* **162**, 889-898.
- Yamada, M. and Sekiguchi, K.** (2015). Molecular Basis of Laminin-Integrin Interactions. *Curr Top Membr* **76**, 197-229.
- Yamazoe, S., Shestopalov, I. A., Provost, E., Leach, S. D. and Chen, J. K.** (2012). Cyclic caged morpholinos: conformationally gated probes of embryonic gene function. *Angew Chem Int Ed Engl* **51**, 6908-6911.

- Yost, C., Torres, M., Miller, J. R., Huang, E., Kimelman, D. and Moon, R. T.** (1996). The axis-inducing activity, stability, and subcellular distribution of beta-catenin is regulated in *Xenopus* embryos by glycogen synthase kinase 3. *Genes & development* **10**, 1443-1454.
- Young, T., Poobalan, Y., Tan, E. K., Tao, S., Ong, S., Wehner, P., Schwenty-Lara, J., Lim, C. Y., Sadasivam, A., Lovatt, M., et al.** (2014). The PDZ domain protein Mcc is a novel effector of non-canonical Wnt signaling during convergence and extension in zebrafish. *Development* **141**, 3505-3516.
- Yurchenco, P. D.** (2015). Integrating Activities of Laminins that Drive Basement Membrane Assembly and Function. *Curr Top Membr* **76**, 1-30.

## FIGURES AND LEGENDS

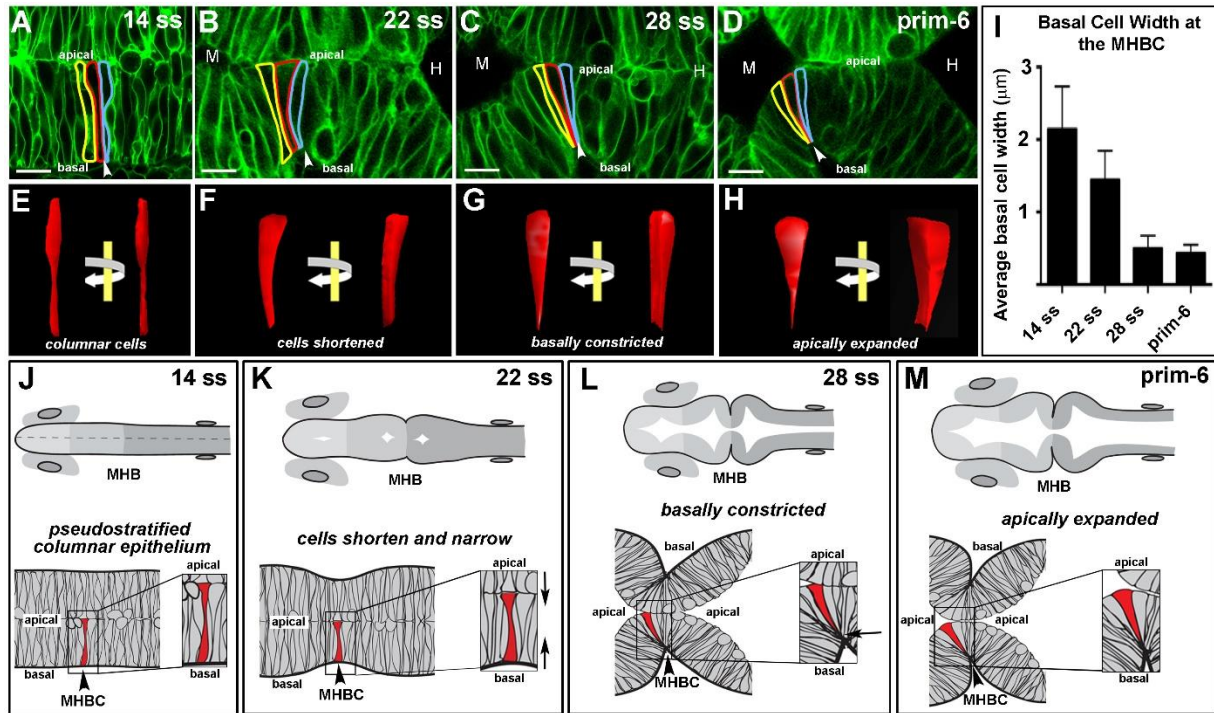

**Fig. 1. Basal constriction at the zebrafish MHBC occurs prior to apical expansion and results in wedge-shaped cells.** (A-D) Live scanning confocal imaging of wild-type embryos injected with mGFP mRNA and imaged at 14 ss, 22 ss, 28 ss, and prim-6. Cells at the MHBC are outlined in yellow, red, and blue. (E-H) 3D reconstruction of red outlined cell using 3D Doctor (Able Software). Each reconstruction is shown from two viewpoints. Face on as in the confocal image, and with a 45° rotation of the same image. (I) Histogram comparing the basal width of cells at each time point. (J-M) Schematics of wild-type MHBC formation. Anterior is to the left in all images. Arrowheads indicate the MHBC. M, midbrain; H, hindbrain. A-D,  $n > 8$  embryos per stage; I,  $n = 3$  embryos with 6 cells measured per embryo for each time point. Error bars reflect  $\pm$  s.d. Scale bars: A-D 9μm.

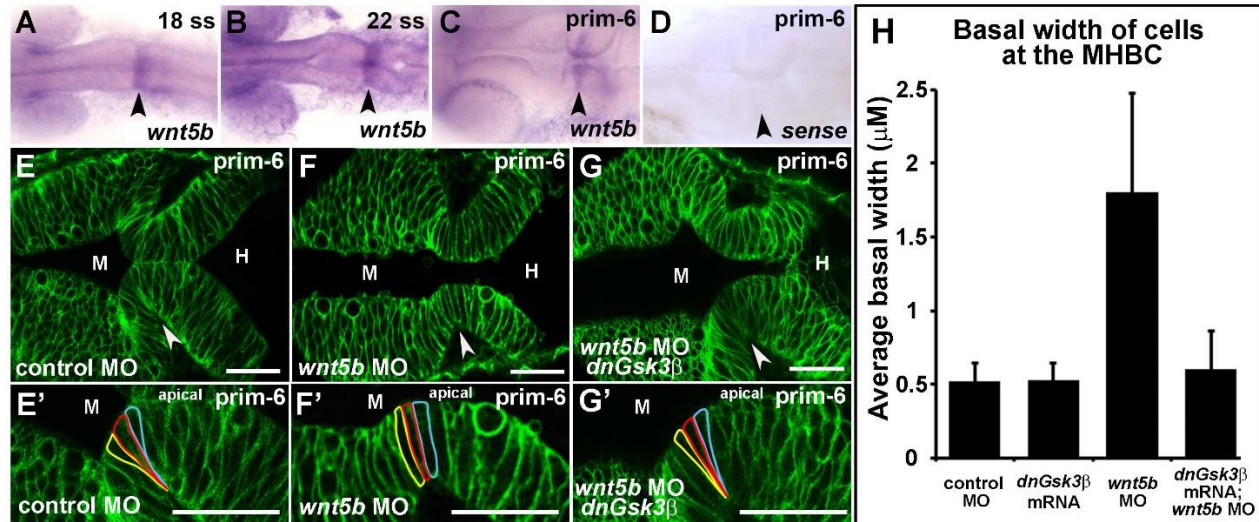

**Fig 2. *Wnt5b* regulates basal constriction possibly through *Gsk3β*.** (A-D) *In situ* hybridization of *wnt5b* expression during MHB development at 18 ss (A), 22 ss (B), and prim-6 (C). (D) prim-6 sense probe control. (E-G') Live confocal images of the MHB region in prim-6 stage embryos. Single-cell wild-type embryos were injected with mGFP to label cell membranes and co-injected with control MO (E, E'), *wnt5b* MO (F, F'), or *wnt5b* MO and *dnGsk3β* mRNA (G, G'). (H) Quantification of basal cell width in control MO, *wnt5b* MO, *dnGsk3β* mRNA (image not shown), and *wnt5b* MO+*dnGsk3β* mRNA injected embryos. (H) For each treatment group,  $n=3$  embryos. For each embryo, 6 cells located at the MHBC were measured, 3 cells on each side. Arrowheads indicate MHBC. M, midbrain; H, hindbrain. Scale bars: 26  $\mu\text{m}$ .

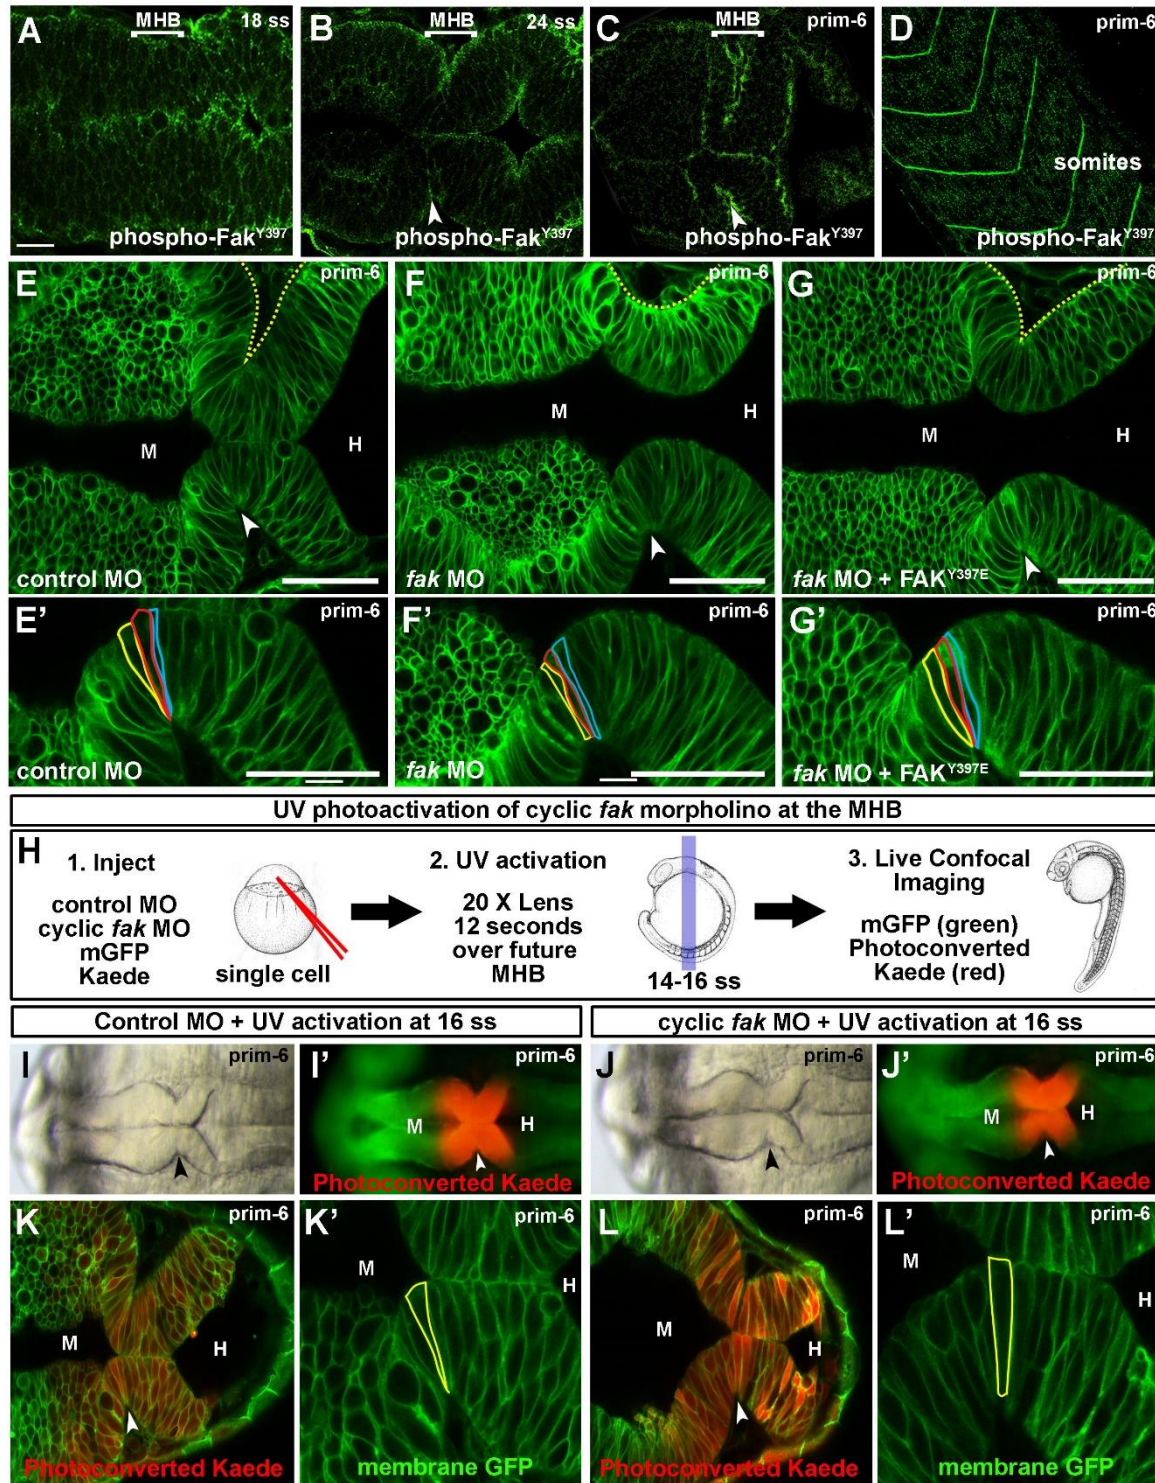

**Fig 3. Focal Adhesion Kinase is required at the MHB for basal constriction.** (A-D) Wild type embryos stained with anti-phospho-Fak<sup>Y397</sup> antibody and imaged by scanning confocal microscopy. (A,B) phospho-Fak<sup>Y397</sup> is localized at the basal and apical sides of the neural tube at 18 and 24 ss. (C) Activated Fak is enriched at the MHBC at prim-6. (D) phospho-Fak<sup>Y397</sup> is localized to somite boundaries at prim-6. (E-G') Live confocal images of embryos co-injected with mGFP and control MO (E,E'), *fak* MO (F,F'), or *fak* MO + FAK<sup>Y397E</sup> mRNA (G,G'). (E'-G')

Magnifications of individual cells outlined at the MHBC. (H) Schematic for *fak* caged MO experiments. 1. One-cell stage wild-type embryos were co-injected with mGFP and photoconvertible *Kaede* mRNA and either control MO or cyclic *fak* MO. 2. Cyclic *fak* MO was uncaged at 16 ss by UV activation. 3. Embryos were incubated until prim-6 and then imaged using brightfield, fluorescence, and live scanning confocal microscopy. (I-J') Gross morphology using brightfield imaging (I,J) and corresponding fluorescent (I',J') images of embryos injected with control MO (I,I') or photoactivatable *fak* MO (J,J') after UV photoconversion. (K-L') Live confocal images showing the MHB region of prim-6 embryos after photoconversion. (K',L') Magnifications of the neuroepithelium shown in K and L with individual cells outlined at the MHBC. ( $n>6$ ). Anterior is to the left in all images. Arrowheads indicate MHBC. M, midbrain; H, hindbrain. Scale bars: A-C = 20 $\mu$ m. E-G' = 50  $\mu$ m.

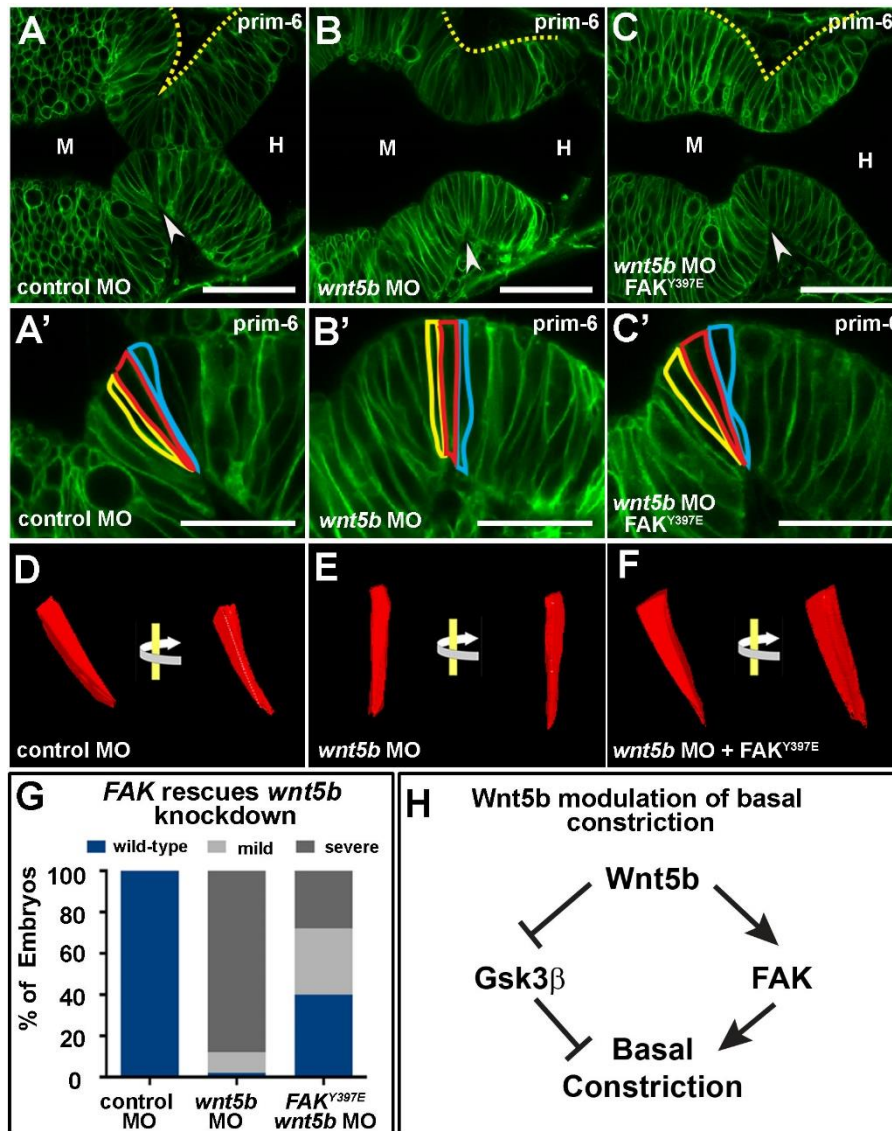

**Fig 4. Focal Adhesion Kinase rescues effects of *wnt5b* knockdown on basal constriction.**

(A-C') Live confocal images of the MHB region in prim-6 stage embryos. Single-cell wild-type embryos were co-injected with mGFP and control MO (A,A'), *wnt5b* MO (B, B'), or *wnt5b* MO and *FAK*<sup>Y397E</sup> mRNA (C,C'). (D-F) 3D reconstruction of cells outlined in (A'-C') using 3D doctor with view of the same cell rotated 45°. (G) Quantification of MHBC gross morphology and basal constriction following *FAK*<sup>397E</sup> mRNA rescue of *wnt5b* knockdown ( $n > 60$  per condition). (H) Model pathway for Wnt5b regulation of basal constriction. Arrowheads indicate MHBC. M, midbrain. H, hindbrain. Scale bars: A-C, 50  $\mu$ m; A'-C' 25  $\mu$ m.
